# Supplementary material
Source: PubMed Central journal article supplement (PMC7212523)

- dotted box indicated region cropped for indicated Figures

Full unedited gel for Figure 3E

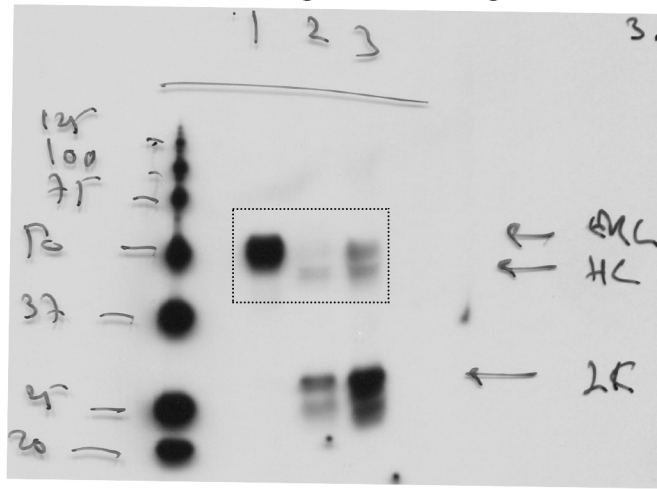

Full unedited gel for Figure 4D

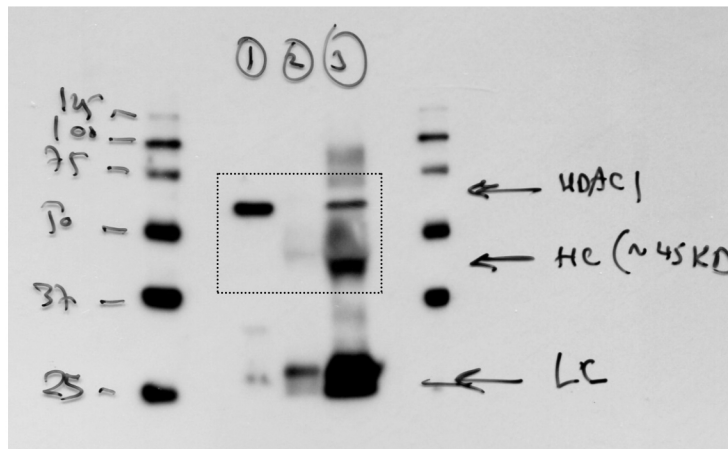

Full unedited blots for Supplementary Figure 2A  
boxed regions indicate area shown in figure

$\alpha$ -NR2F2

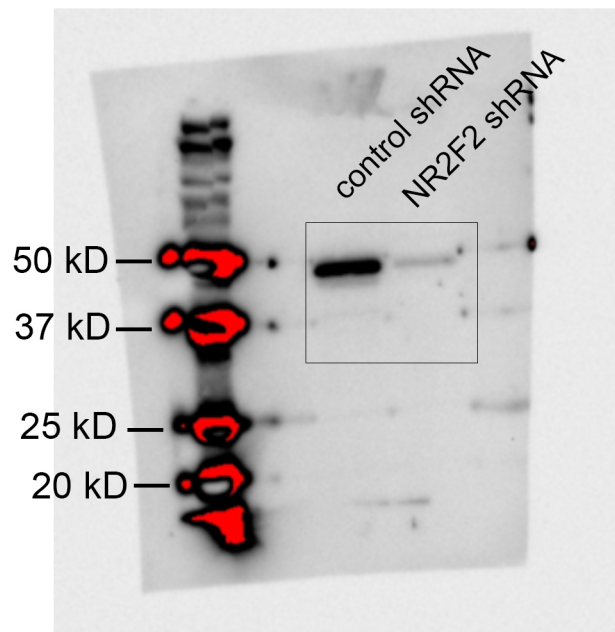

$\alpha$ -TUBB

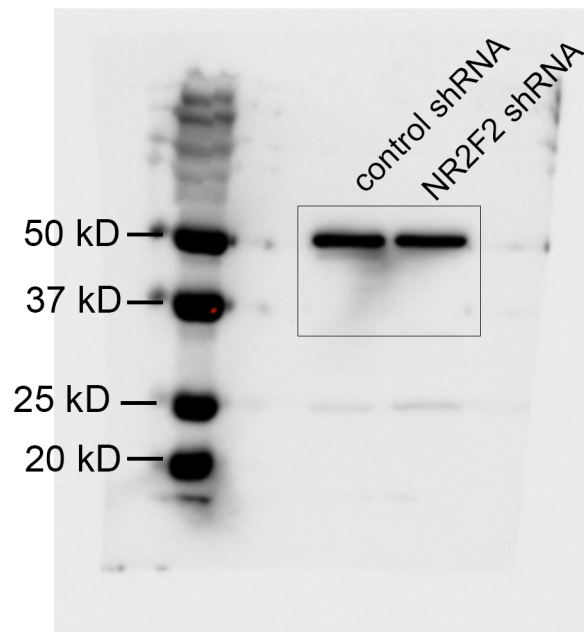

Full unedited gel for Supplementary Figure VIA  
boxed regions indicate area shown in figure

H3K27ac

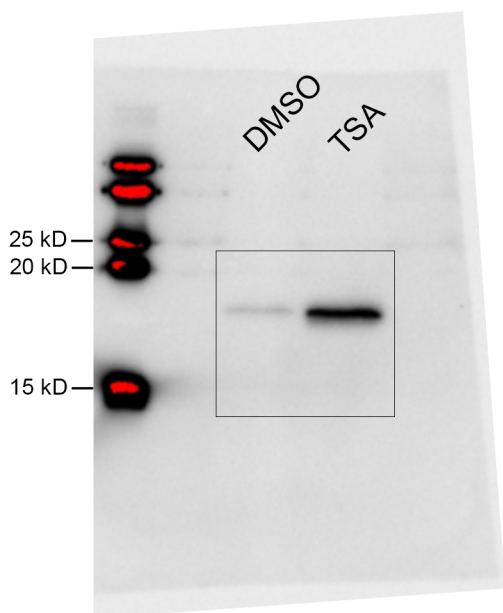

total H3

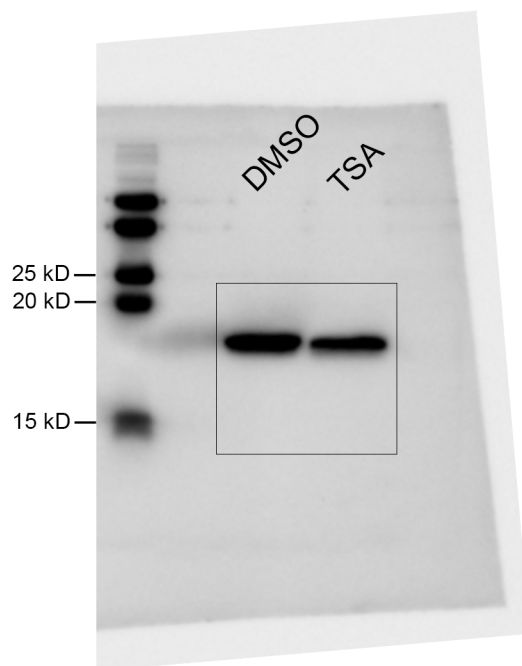

Full unedited blots for Supplementary Figure VIB  
boxed regions indicate area shown in figure

$\alpha$ -TUBB

$\alpha$ -HDAC1

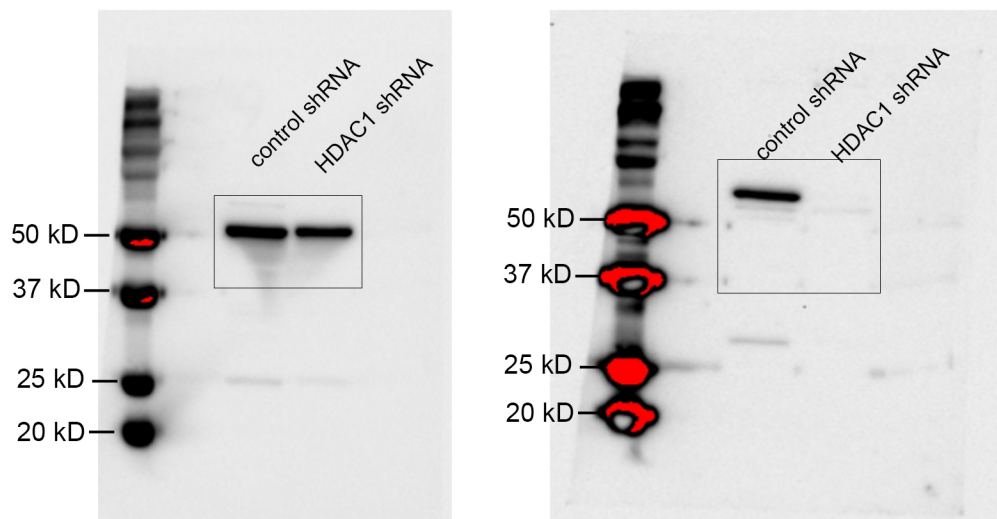

Supplement: NIHMS1563571-supplement-316075_Uncut_Gel_Blots.pdf [file NIHMS1563571-supplement-316075_Uncut_Gel_Blots.pdf]
